# Supplementary material for: Transcriptional Responses of Sclerotinia sclerotiorum to the Infection by SsHADV-1
Source: MDPI journal article supplement (doi:10.3390/jof7070493), 2021-06-22
Supplement: s1 [file s1]

DNA replication and DNA damage response

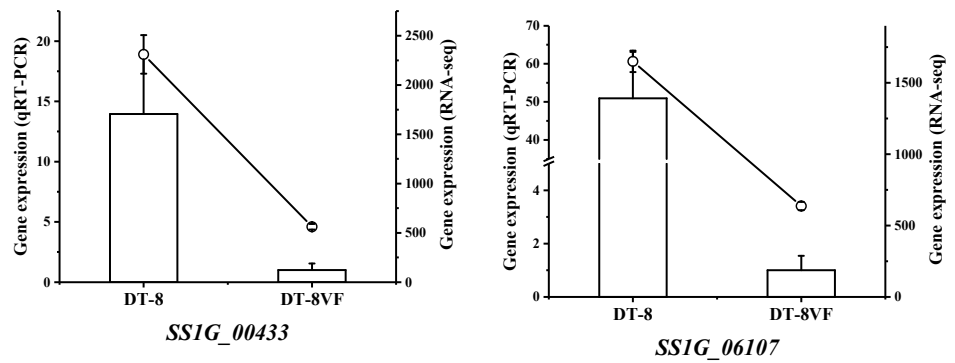

Effector-like small secretory proteins

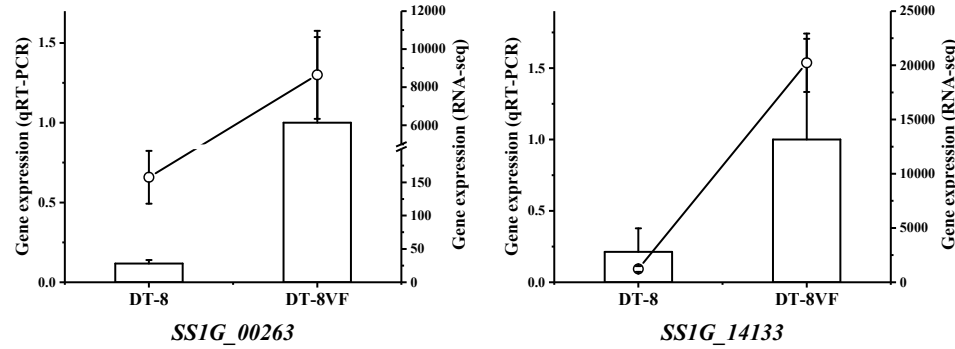

Carbohydrate transmembrane transport

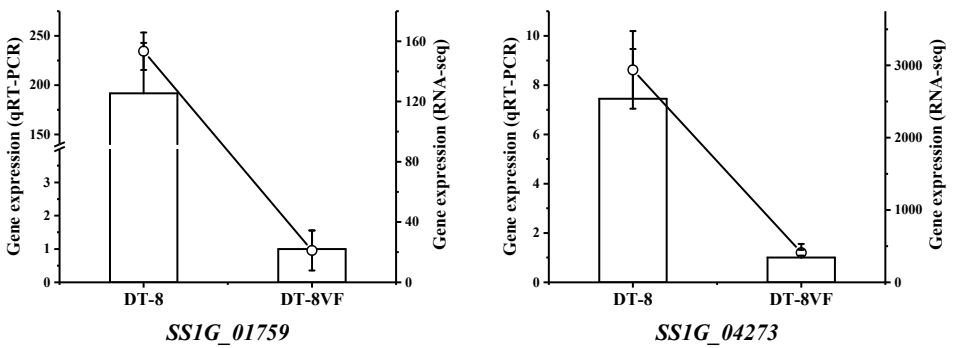

Antiviral RNA silencing

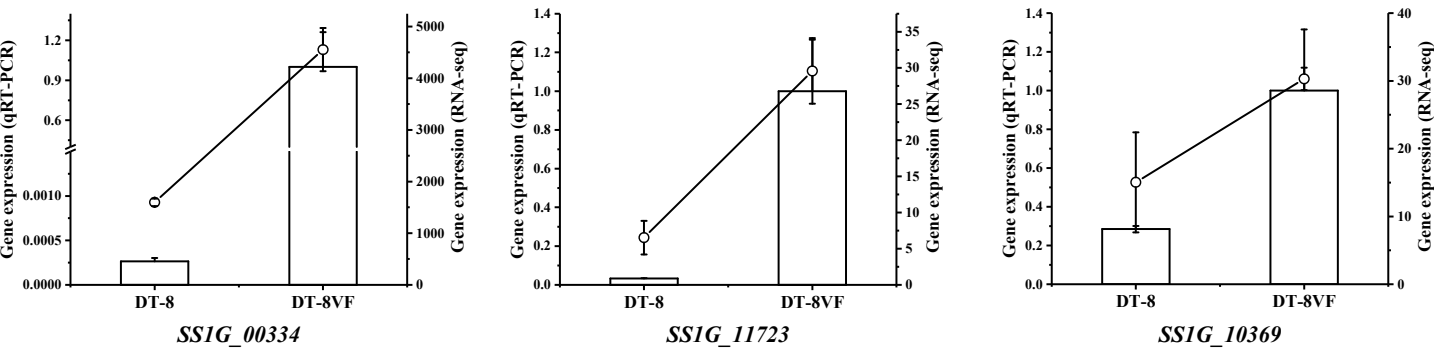

OA metabolism

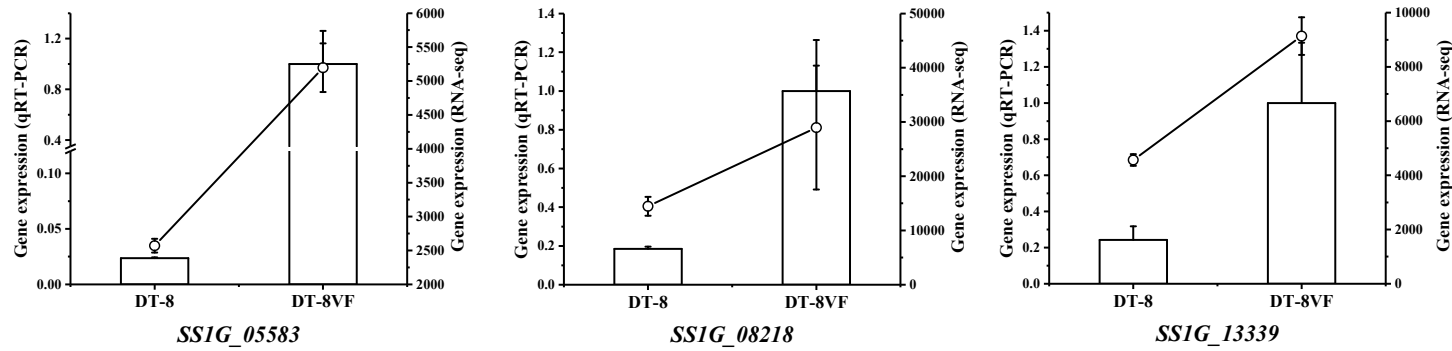

□ qRT-PCR      —○— RNA-seq

Figure S2 The expression of *S. sclerotiorum* genes detected by qRT-PCR and RNA-seq
