# Supplementary material for: Transcriptional Responses of Sclerotinia sclerotiorum to the Infection by SsHADV-1
Source: MDPI journal article supplement (doi:10.3390/jof7070493), 2021-06-22
Supplement: s1 [file s1]

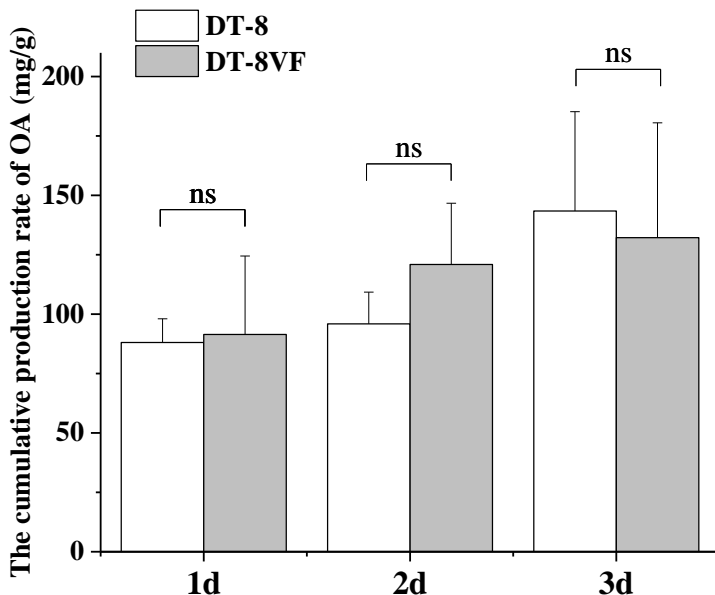

Figure S1 The cumulative production rate of OA of strain DT-8 and DT-8VF. Results are means of three replicates per sample including standard deviation. Data were analyzed by the Student's t-test ( $P=0.05$ ). ns: non-significant differences.
